# Supplementary material for: Nodularia spumigena Peptides—Accumulation and Effect on Aquatic Invertebrates
Source: Toxins (Basel). 2015 Oct 30;7(11):4404–20. doi: 10.3390/toxins7114404 (PMC4663510; doi:10.3390/toxins7114404)
Supplement: Supplementary File 1 [file toxins-07-04404-s001.pdf]

## Supplementary Information

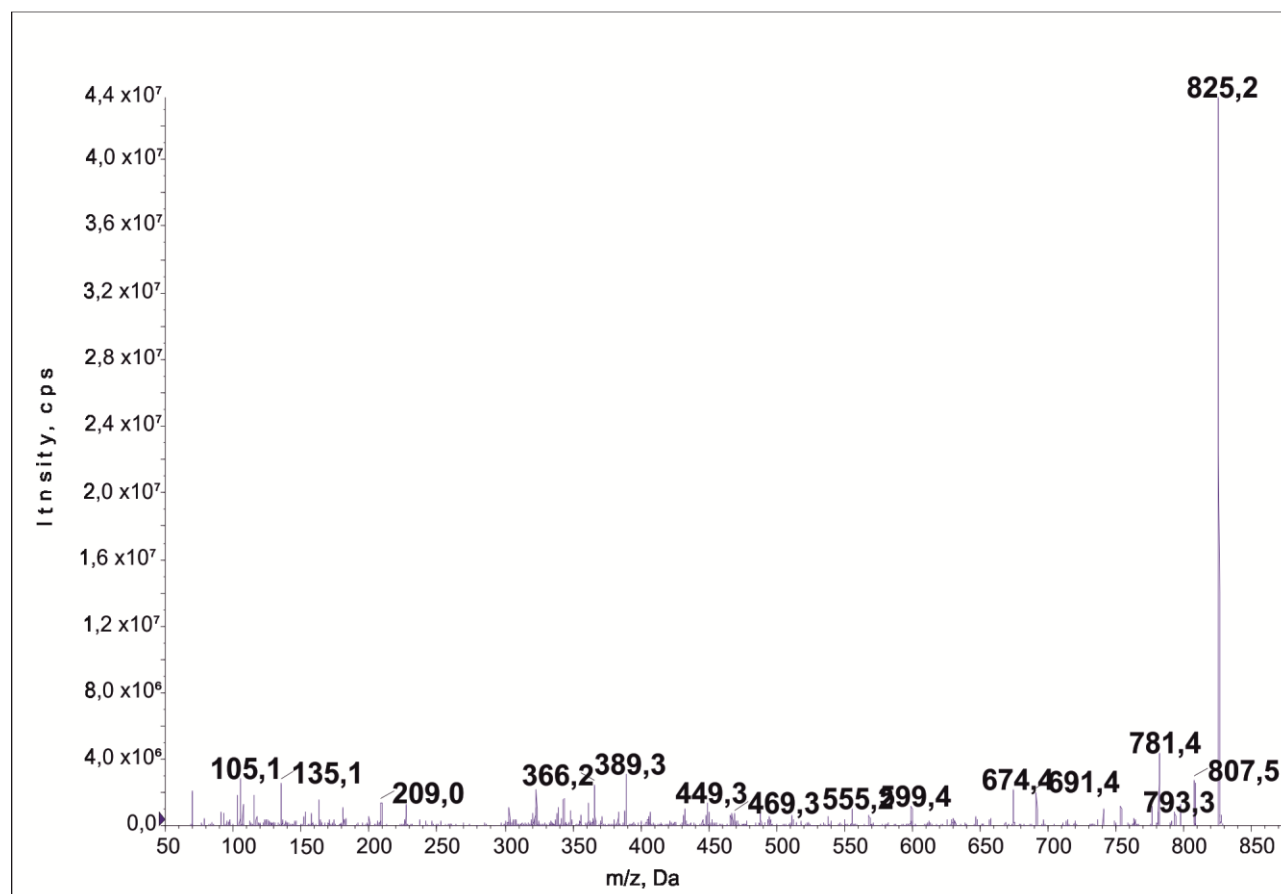

**Figure S1.** Fragmentation spectrum of nodularin detected in *Artemia franciscana* exposed to *Nodularia spumigena* extract. The peptide is characterized by pseudomolecular ion  $[M+H]^+$  at  $m/z$  825 and structure Cyclo[MeAsp-Arg-Adda-Glu-Mdhb].

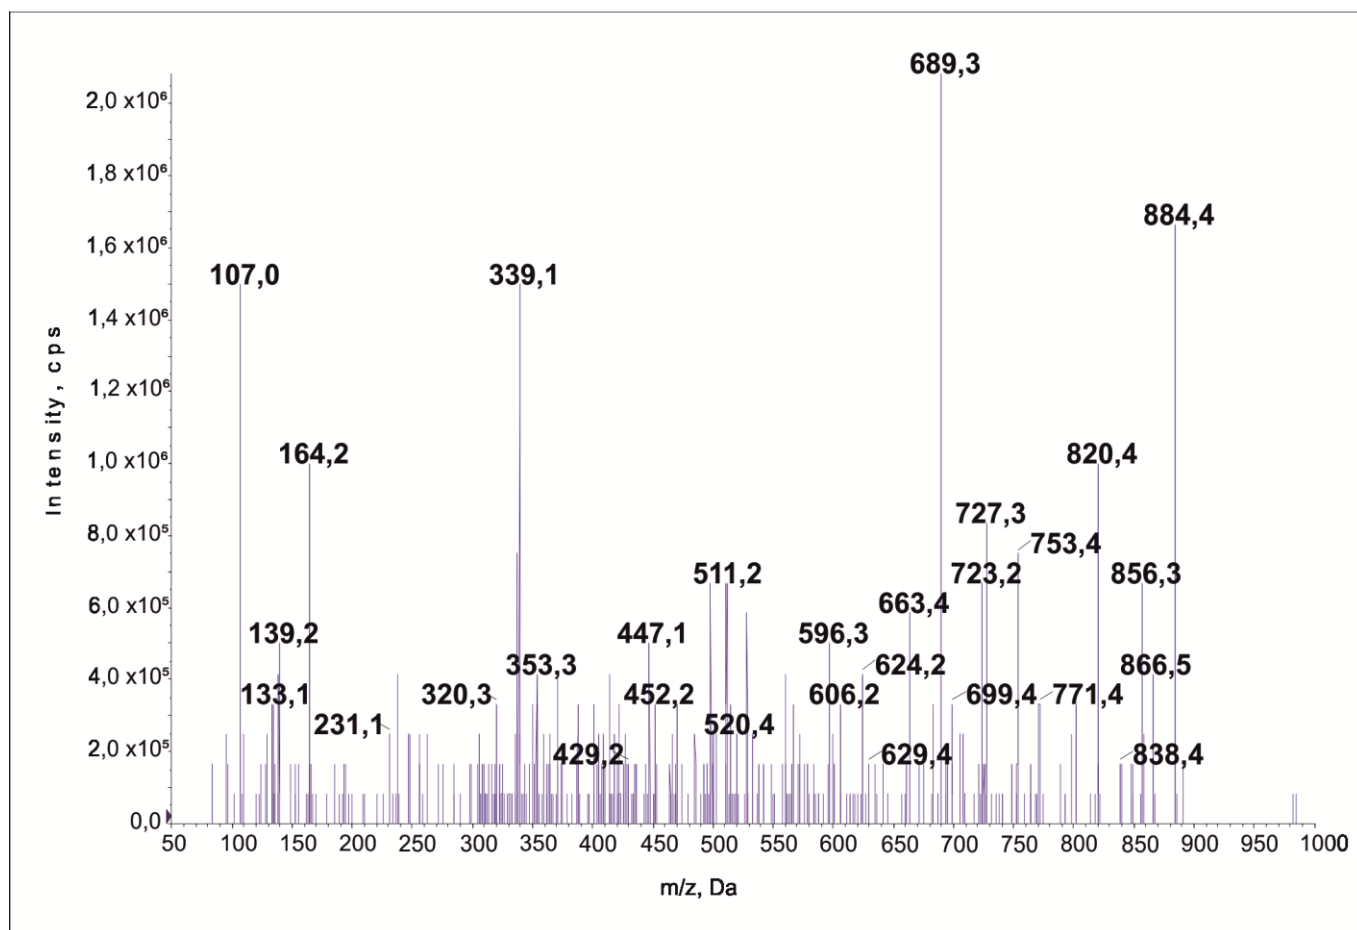

**Figure S2.** Fragmentation spectrum of anabaenopeptin AP884 detected in *Artemia franciscana* exposed to *Nodularia spumigena* extract. The peptide is characterized by pseudomolecular ion  $[M+H]^+$  at  $m/z$  884 and structure Ile-CO-[Lys-Val-Hph-MeHty-MetO].

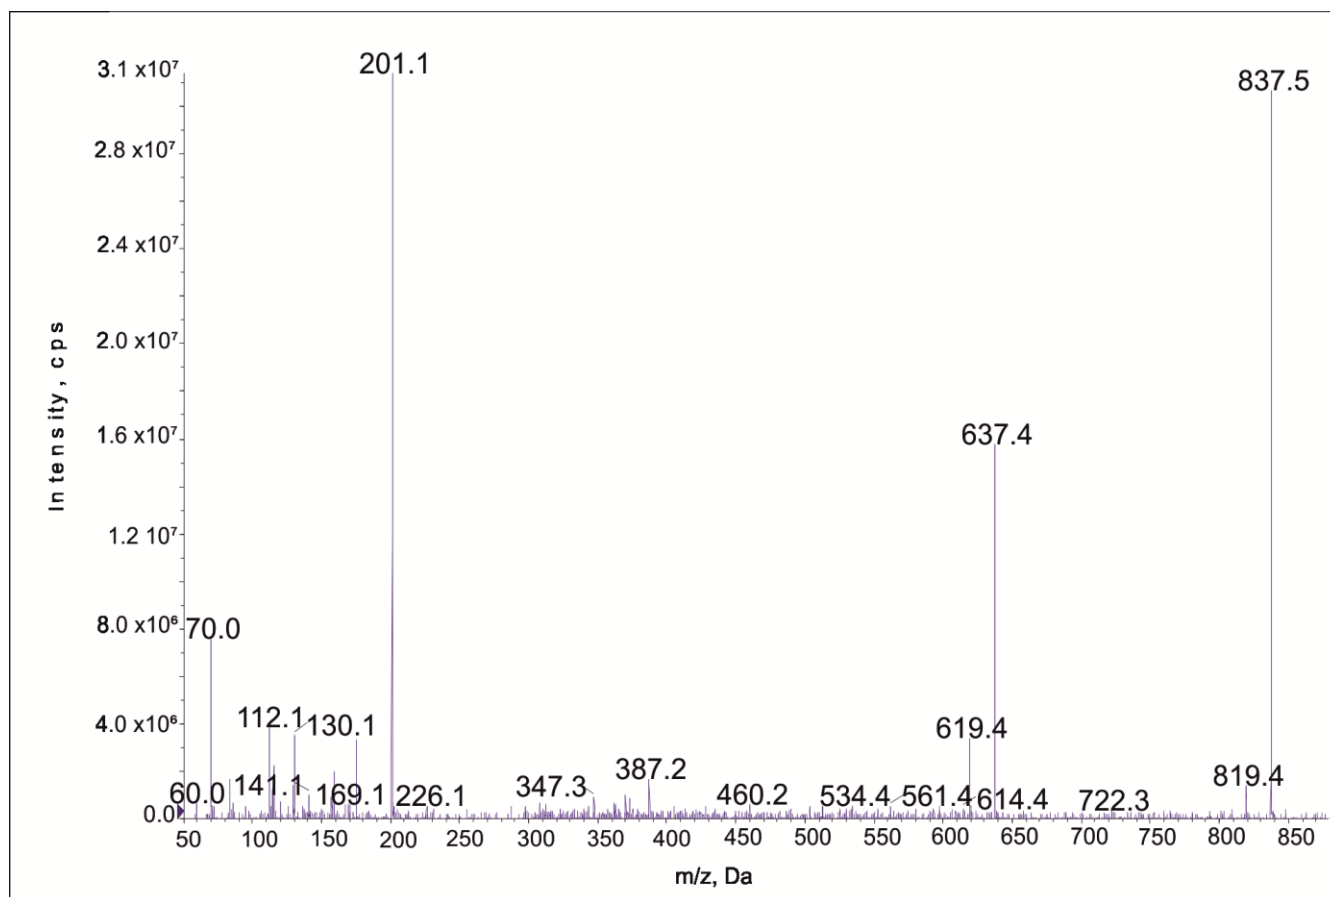

**Figure S3.** Fragmentation spectrum of anabaenopeptin B (AP837) detected in smaller mussels (<2 cm). The peptide is characterized by pseudomolecular ion  $[M+H]^+$  at  $m/z$  837 and structure Arg-CO-[Lys-Val-Hty-MeAla-Phe].

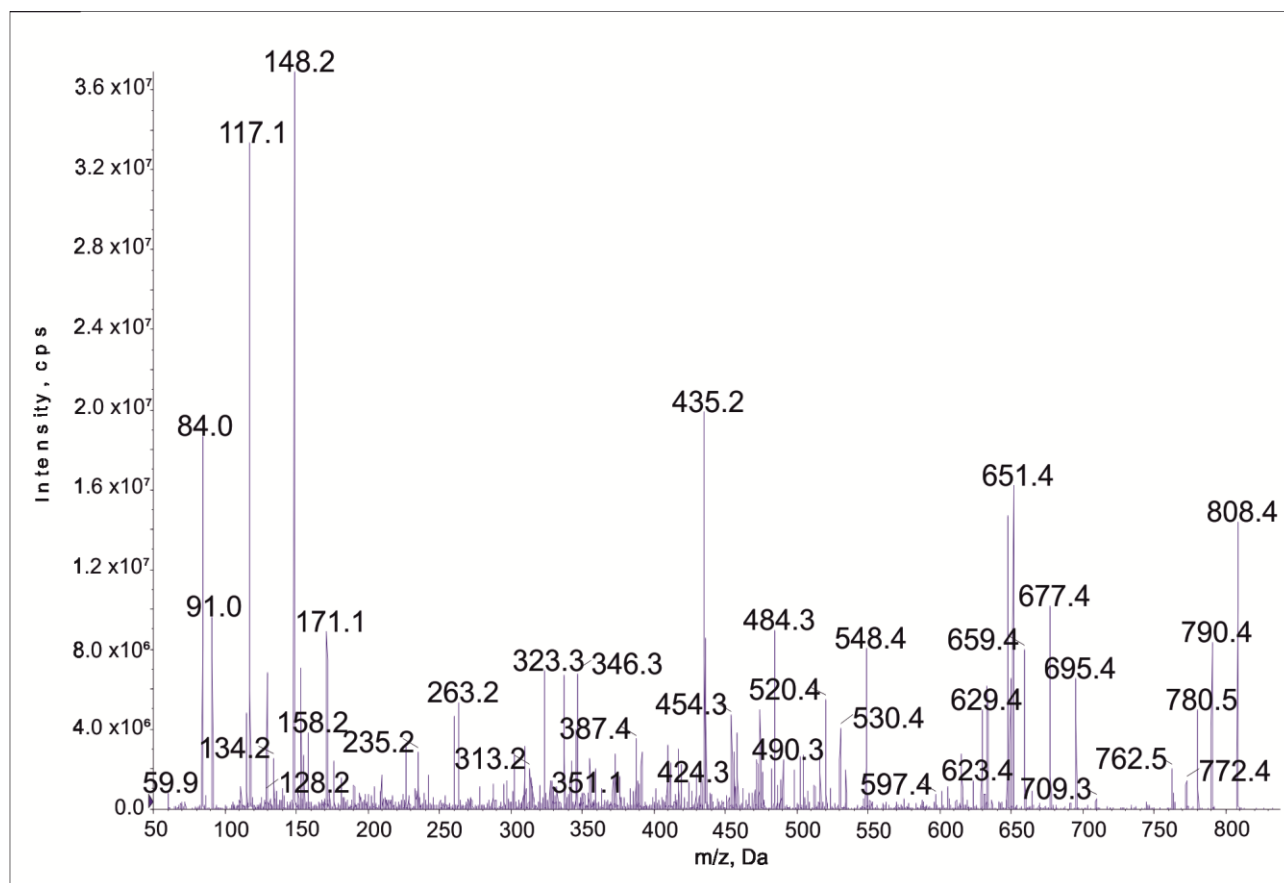

**Figure S4.** Fragmentation spectrum of anabaenopeptin AP808 detected in smaller mussels (<2 cm). The peptide is characterized by pseudomolecular ion  $[M+H]^+$  at m/z 808 and structure Ile-CO-[Lys-Val-Hty-MeAla-Hph].

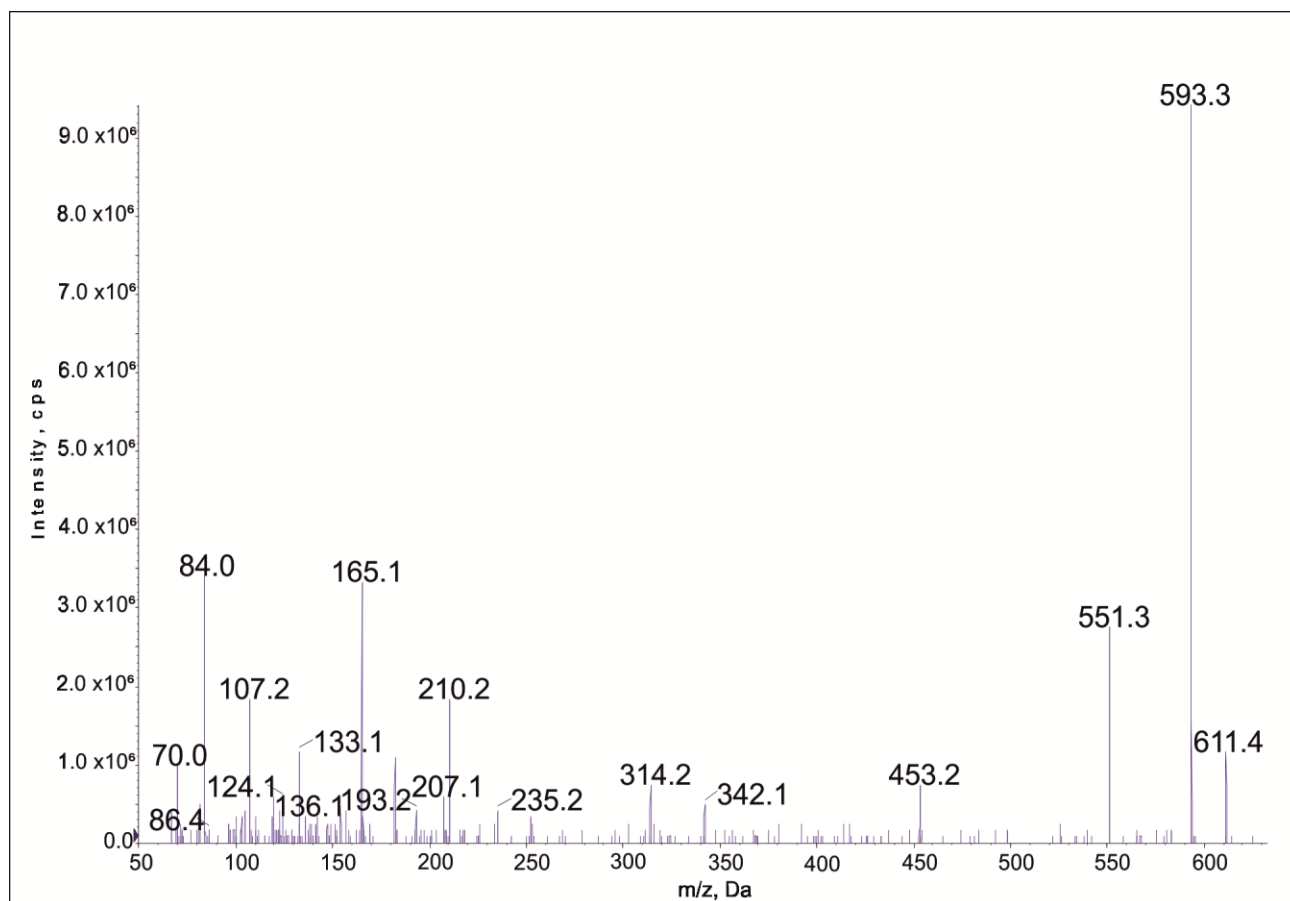

**Figure S5.** Fragmentation spectrum of spumigin SPU611 detected in *Artemia franciscana* exposed to *Nodularia spumigena* extract. The peptide is characterized by pseudomolecular ion  $[M+H]^+$  at  $m/z$  611 and structure Hpla-Hty-MePro-Argal.

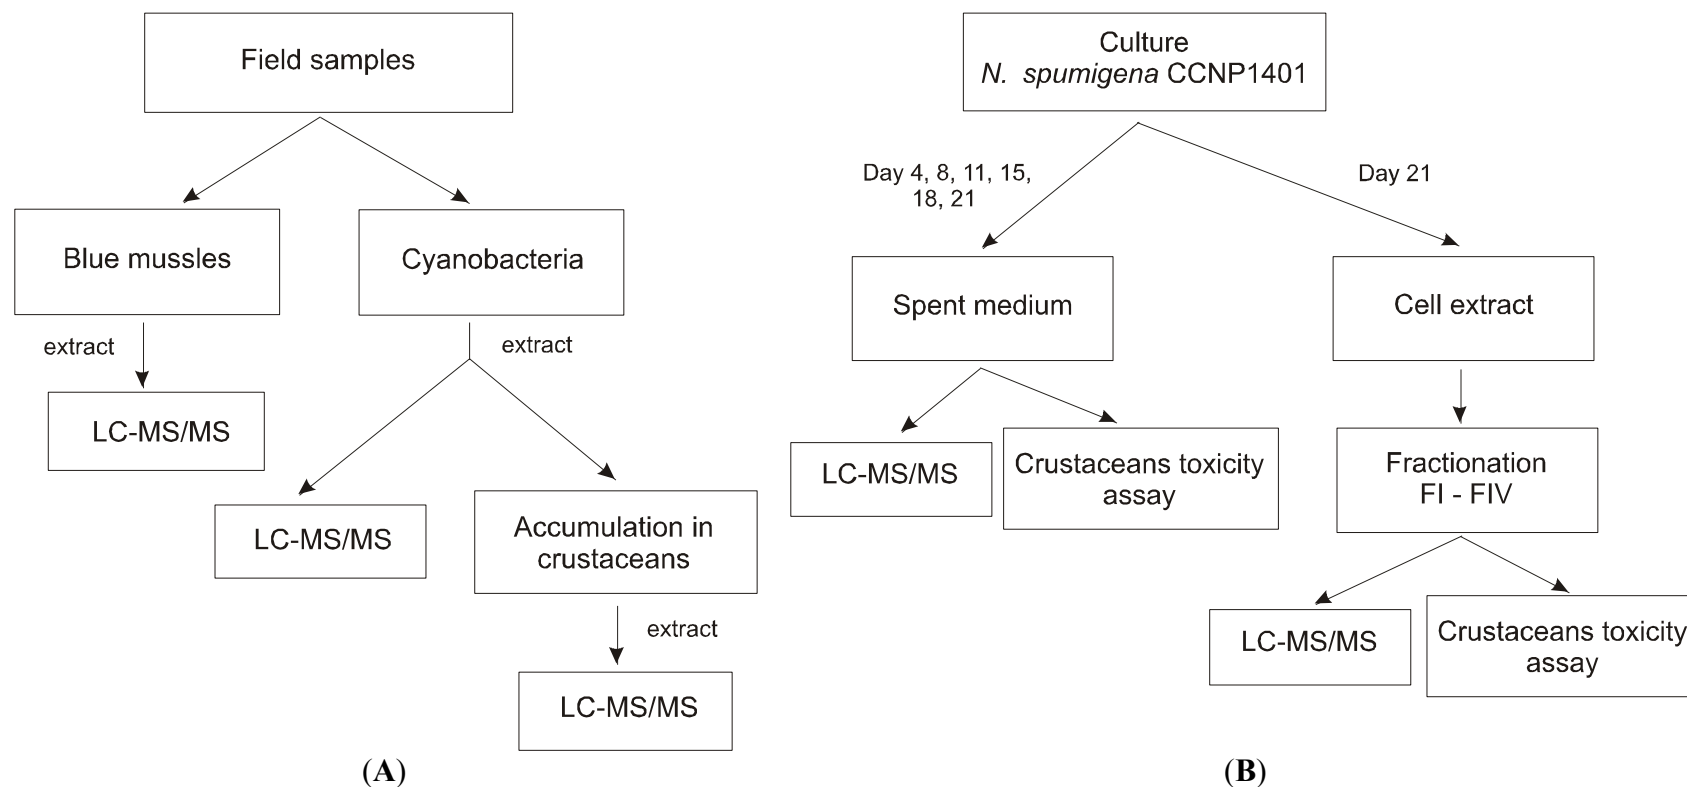

**Figure S6.** Schematic diagram of experimental setup: Accumulation of cyanobacterial peptides in blue mussels and crustaceans *Thamnocephalus platyurus* and *Artemia franciscana* (A); Effect of *Nodularia spumigena* cell extract and spent medium on the crustaceans (B).
